# Supplementary material for: Machine learning evaluation of immune infiltrate through digital tumour score allows prediction of survival outcome in a pooled analysis of three international stage III colon cancer cohorts
Source: PubMed Central journal article supplement (PMC11233898; doi:10.1016/j.ebiom.2024.105207), 2024-06-15
Supplement: mmc1.pdf [file mmc1.pdf]

# **Supplementary materials**

## Table of contents

|                                                                                                                                                                                                                                                     |    |
|-----------------------------------------------------------------------------------------------------------------------------------------------------------------------------------------------------------------------------------------------------|----|
| <b>Supplementary Table 1:</b> Comparison of clinical variables between included and excluded patients for each data set (PETACC08, Prodigie-13 and HARMONY). Only patients with stage III colorectal cancer and clinical data were considered. .... | 2  |
| <b>Supplementary Table 2:</b> Comparison of clinical variables between external validation cohorts.....                                                                                                                                             | 3  |
| <b>Supplementary Table 3:</b> Pairwise comparisons of clinical variables between cohorts. ....                                                                                                                                                      | 4  |
| <b>Supplementary Table 4:</b> Comparisons of clinical variables according to CD3 status (High vs Other) in each cohort.....                                                                                                                         | 5  |
| <b>Supplementary Table 5:</b> Comparisons of clinical variables according to CD3ML status in each cohort. ....                                                                                                                                      | 6  |
| <b>Supplementary Figure 1: Flowcharts of study</b> .....                                                                                                                                                                                            | 7  |
| <b>Supplementary Figure 2: Clinical variables and digital scores</b> .....                                                                                                                                                                          | 8  |
| <b>Supplementary Figure 3: Association between CD3 and CD3ML scores</b> .....                                                                                                                                                                       | 9  |
| <b>Supplementary Figure 4: Association between CD3ML score and N status in all cohort.</b> ....                                                                                                                                                     | 10 |
| <b>Supplementary Figure 5: Association between risk stage and CD3ML score in each cohort</b> .....                                                                                                                                                  | 11 |
| <b>Supplementary Figure 6: Predictive power of clinical and digital variables</b> .....                                                                                                                                                             | 12 |

**Supplementary Table 1:** Comparison of clinical variables between included and excluded patients for each data set (PETACC08, Prodig-13 and HARMONY). Only patients with stage III colorectal cancer and clinical data were considered.

| Variables                      | PETACC08                  |                               |         |                  | Prodige-13                 |                            |         |                  | HARMONY                    |                            |         |                  |
|--------------------------------|---------------------------|-------------------------------|---------|------------------|----------------------------|----------------------------|---------|------------------|----------------------------|----------------------------|---------|------------------|
|                                | Excluded patients<br>N=39 | Included patients<br>N= 1,152 | P-value | Adjusted p-value | Excluded patients<br>N=289 | Included patients<br>N=322 | P-value | Adjusted p-value | Excluded patients<br>N=212 | Included patients<br>N=187 | P-value | Adjusted p-value |
| Sex                            |                           |                               | 0.6     | 0.7              |                            |                            | 0.4     | 0.5              |                            |                            | 0.9     | 0.9              |
| Male                           | 21 (54%)                  | 667 (58%)                     |         |                  | 175 (61%)                  | 183 (57%)                  |         |                  | 129 (61%)                  | 115 (61%)                  |         |                  |
| Female                         | 18 (46%)                  | 485 (42%)                     |         |                  | 114 (39%)                  | 139 (43%)                  |         |                  | 83 (39%)                   | 72 (39%)                   |         |                  |
| Age                            |                           |                               | 0.6     | 0.7              |                            |                            | 0.052   | 0.2              |                            |                            | 0.3     | 0.5              |
| ≤60                            | 60 (52, 67)               | 61 (54, 67)                   | 0.8     | 0.9              | 66 (59, 73)                | 67 (60, 76)                | 0.4     | 0.5              | 69 (61, 77)                | 67 (60, 76)                | 0.5     | 0.7              |
| >60                            | 20 (51%)                  | 568 (49%)                     |         |                  | 83 (29%)                   | 82 (25%)                   |         |                  | 49 (23%)                   | 49 (26%)                   |         |                  |
|                                | 19 (49%)                  | 584 (51%)                     |         |                  | 206 (71%)                  | 240 (75%)                  |         |                  | 163 (77%)                  | 138 (74%)                  |         |                  |
| Histopathological grade        |                           |                               | <0.001  | <0.001           |                            |                            | 0.5     | 0.5              |                            |                            | 0.15    | 0.5              |
| Well/Moderately differentiated | 16 (59%)                  | 945 (82%)                     |         |                  | 273 (96%)                  | 312 (97%)                  |         |                  | 147 (70%)                  | 143 (76%)                  |         |                  |
| Poorly differentiated          | 5 (19%)                   | 207 (18%)                     |         |                  | 12 (4.2%)                  | 10 (3.1%)                  |         |                  | 63 (30%)                   | 44 (24%)                   |         |                  |
| Undifferentiated               | 6 (22%)                   | 0 (0%)                        |         |                  | 0                          | 0                          |         |                  | 0                          | 0                          |         |                  |
| Unknown                        | 12                        | 0                             |         |                  | 4                          | 0                          |         |                  | 2                          | 0                          |         |                  |
| T status                       |                           |                               | 0.3     | 0.5              |                            |                            | 0.4     | 0.5              |                            |                            | 0.2     | 0.5              |
| 1-3                            | 28 (74%)                  | 927 (80%)                     |         |                  | 230 (82%)                  | 255 (79%)                  |         |                  | 187 (89%)                  | 157 (84%)                  |         |                  |
| 4                              | 10 (26%)                  | 225 (20%)                     |         |                  | 51 (18%)                   | 67 (21%)                   |         |                  | 24 (11%)                   | 30 (16%)                   |         |                  |
| Unknown                        | 1                         | 0                             |         |                  | 8                          | 0                          |         |                  | 1                          | 0                          |         |                  |
| N status                       |                           |                               | 0.2     | 0.4              |                            |                            | 0.3     | 0.5              |                            |                            | 0.2     | 0.5              |
| 0                              | 0                         | 0                             |         |                  | 2 (0.7%)                   | 0 (0%)                     |         |                  | 0                          | 0                          |         |                  |
| 1                              | 21 (54%)                  | 744 (65%)                     |         |                  | 211 (73%)                  | 228 (71%)                  |         |                  | 131 (62%)                  | 127 (68%)                  |         |                  |
| 2                              | 18 (46%)                  | 408 (35%)                     |         |                  | 76 (26%)                   | 94 (29%)                   |         |                  | 81 (38%)                   | 60 (32%)                   |         |                  |
| Risk Stage                     |                           |                               | 0.11    | 0.3              |                            |                            | 0.2     | 0.5              |                            |                            | 0.6     | 0.7              |
| Low                            | 16 (41%)                  | 622 (54%)                     |         |                  | 175 (62%)                  | 185 (57%)                  |         |                  | 117 (55%)                  | 108 (58%)                  |         |                  |
| High                           | 23 (59%)                  | 530 (46%)                     |         |                  | 106 (38%)                  | 137 (43%)                  |         |                  | 94 (45%)                   | 79 (42%)                   |         |                  |
| Unknown                        |                           |                               |         |                  | 8                          | 0                          |         |                  | 1                          | 0                          |         |                  |
| M status                       |                           |                               | 0.12    | 0.3              |                            |                            |         |                  |                            |                            |         |                  |
| 0                              | 32 (82%)                  | 969 (84%)                     |         |                  | 0                          | 0                          |         |                  |                            |                            |         |                  |
| 1                              | 1 (2.6%)                  | 2 (0.2%)                      |         |                  | 0                          | 0                          |         |                  |                            |                            |         |                  |
| x                              | 6 (15%)                   | 181 (16%)                     |         |                  | 0                          | 0                          |         |                  |                            |                            |         |                  |
| MSI or MMR status              |                           |                               | 0.082   | 0.3              |                            |                            | 0.5     | 0.5              |                            |                            | 0.5     | 0.7              |
| MSS or pMMR                    | 32 (82%)                  | 1,028 (91%)                   |         |                  | 21 (84%)                   | 2 (67%)                    |         |                  | 21 (10%)                   | 22 (12%)                   |         |                  |
| MSI or dMMR                    | 7 (18%)                   | 101 (8.9%)                    |         |                  | 4 (16%)                    | 1 (33%)                    |         |                  | 189 (90%)                  | 161 (88%)                  |         |                  |
| Unknown                        | 0                         | 23                            |         |                  | 264                        | 319                        |         |                  | 2                          | 4                          |         |                  |
| Sidedness                      |                           |                               | 0.12    | 0.3              |                            |                            | <0.001  | <0.001           |                            |                            | <0.001  | <0.001           |
| Left                           | 18 (46%)                  | 676 (59%)                     |         |                  | 121 (42%)                  | 171 (53%)                  |         |                  | 75 (35%)                   | 108 (58%)                  |         |                  |
| Rectum                         | 0                         | 0                             |         |                  | 89 (31%)                   | 0 (0%)                     |         |                  | 64 (30%)                   | 0 (0%)                     |         |                  |
| Right                          | 21 (54%)                  | 476 (41%)                     |         |                  | 79 (27%)                   | 151 (47%)                  |         |                  | 73 (34%)                   | 79 (42%)                   |         |                  |
| Lung metastasis                |                           |                               | 0.5     | 0.7              |                            |                            |         |                  |                            |                            |         |                  |
| 1                              | 1 (2.6%)                  | 83 (7.2%)                     |         |                  | 0                          | 0                          |         |                  | 0                          | 0                          |         |                  |
| Unknown                        | 0                         | 0                             |         |                  | 289                        | 322                        |         |                  | 212                        | 187                        |         |                  |
| Liver metastasis               |                           |                               | 0.4     | 0.7              |                            |                            |         |                  |                            |                            |         |                  |
| 109                            | 5 (13%)                   | 9.5%                          |         |                  | 0                          | 0                          |         |                  | 0                          | 0                          |         |                  |
| Unknown                        | 0                         | 0                             |         |                  | 289                        | 322                        |         |                  | 212                        | 187                        |         |                  |
| Bone metastasis                |                           |                               | >0.9    | >0.9             |                            |                            |         |                  |                            |                            |         |                  |
| 0 (0%)                         | 0                         | 8 (0.7%)                      |         |                  | 0                          | 0                          |         |                  | 0                          | 0                          |         |                  |
| Unknown                        | 0                         | 0                             |         |                  | 289                        | 322                        |         |                  | 212                        | 187                        |         |                  |
| Other metastasis               |                           |                               | 0.053   | 0.3              |                            |                            |         |                  |                            |                            |         |                  |
| 5 (13%)                        | 59 (5.1%)                 |                               |         |                  | 0                          | 0                          |         |                  | 0                          | 0                          |         |                  |
| Unknown                        | 0                         | 0                             |         |                  | 289                        | 322                        |         |                  | 212                        | 187                        |         |                  |
| KRAS                           |                           |                               | 0.6     | 0.7              |                            |                            |         |                  |                            |                            |         |                  |
| Mutated                        | 15 (41%)                  | 505 (45%)                     |         |                  | 0                          | 0                          |         |                  | 0                          | 0                          |         |                  |
| Wild-Type                      | 22 (59%)                  | 606 (55%)                     |         |                  | 0                          | 0                          |         |                  | 0                          | 0                          |         |                  |
| Unknown                        | 2                         | 41                            |         |                  | 289                        | 322                        |         |                  | 212                        | 187                        |         |                  |
| BRAF                           |                           |                               | 0.3     | 0.5              |                            |                            |         |                  |                            |                            |         |                  |
| Mutated                        | 6 (16%)                   | 122 (11%)                     |         |                  | 0                          | 0                          |         |                  | 0                          | 0                          |         |                  |
| Wild-Type                      | 31 (84%)                  | 959 (89%)                     |         |                  | 0                          | 0                          |         |                  | 0                          | 0                          |         |                  |
| Unknown                        | 2                         | 71                            |         |                  | 289                        | 322                        |         |                  | 212                        | 187                        |         |                  |

MSI: Microsatellite Instability; MMR: Mismatch Repair; MSS: Microsatellite Stable; dMMR: deficient Mismatch Repair; pMMR: proficient Mismatch repair

**Supplementary Table 2:** Comparison of clinical variables between external validation cohorts

| Variables                      | External validation cohort<br>N = 672 | Prodige-13<br>N = 322 | PETACC08 sub2<br>N = 163 | HARMONY<br>N = 187 | P-value | Adjusted p-value |
|--------------------------------|---------------------------------------|-----------------------|--------------------------|--------------------|---------|------------------|
| Sex                            |                                       |                       |                          |                    | 0.5     | 0.7              |
| Male                           | 389 (58%)                             | 183 (57%)             | 91 (56%)                 | 115 (61%)          |         |                  |
| Female                         | 283 (42%)                             | 139 (43%)             | 72 (44%)                 | 72 (39%)           |         |                  |
| Age                            | 65 (57, 73)                           | 67 (60, 76)           | 59 (53, 65)              | 67 (60, 76)        | <0.001  | <0.001           |
| ≤60                            | 223 (33%)                             | 82 (25%)              | 92 (56%)                 | 49 (26%)           | <0.001  | <0.001           |
| >60                            | 449 (67%)                             | 240 (75%)             | 71 (44%)                 | 138 (74%)          |         |                  |
| Histopathological grade        |                                       |                       |                          |                    | <0.001  | <0.001           |
| Well/Moderately differentiated | 589 (88%)                             | 312 (97%)             | 134 (82%)                | 143 (76%)          |         |                  |
| Poorly differentiated          | 83 (12%)                              | 10 (3.1%)             | 29 (18%)                 | 44 (24%)           |         |                  |
| T status                       |                                       |                       |                          |                    | 0.4     | 0.7              |
| 1-3                            | 543 (81%)                             | 255 (79%)             | 131 (80%)                | 157 (84%)          |         |                  |
| 4                              | 129 (19%)                             | 67 (21%)              | 32 (20%)                 | 30 (16%)           |         |                  |
| N status                       |                                       |                       |                          |                    | 0.2     | 0.4              |
| 1                              | 457 (68%)                             | 228 (71%)             | 102 (63%)                | 127 (68%)          |         |                  |
| 2                              | 215 (32%)                             | 94 (29%)              | 61 (37%)                 | 60 (32%)           |         |                  |
| Risk Stage                     |                                       |                       |                          |                    | 0.5     | 0.7              |
| Low                            | 378 (56%)                             | 185 (57%)             | 85 (52%)                 | 108 (58%)          |         |                  |
| High                           | 294 (44%)                             | 137 (43%)             | 78 (48%)                 | 79 (42%)           |         |                  |
| M status                       |                                       |                       |                          |                    | <0.001  | <0.001           |
| 0                              | 132 (20%)                             | 0 (0%)                | 132 (81%)                | 0 (0%)             |         |                  |
| 1                              | 0 (0%)                                | 0 (0%)                | 0 (0%)                   | 0 (0%)             |         |                  |
| x                              | 540 (80%)                             | 322 (100%)            | 31 (19%)                 | 187 (100%)         |         |                  |
| MSI or MMR status              |                                       |                       |                          |                    | 0.2     | 0.4              |
| MSS or pMMR                    | 520 (91%)                             | 210 (91%)             | 149 (94%)                | 161 (88%)          |         |                  |
| MSI or dMMR                    | 53 (9.2%)                             | 21 (9.1%)             | 10 (6.3%)                | 22 (12%)           |         |                  |
| Unknown                        | 99                                    | 91                    | 4                        | 4                  |         |                  |
| Sidedness                      |                                       |                       |                          |                    | 0.1     | 0.3              |
| Left                           | 382 (57%)                             | 171 (53%)             | 103 (63%)                | 108 (58%)          |         |                  |
| Right                          | 290 (43%)                             | 151 (47%)             | 60 (37%)                 | 79 (42%)           |         |                  |
| Lung metastasis                | 10 (6.1%)                             | 0 (0%)                | 10 (6.1%)                | 0                  | >0.9    | >0.9             |
| Unknown                        | 509                                   | 322                   | 0                        | 187                |         |                  |
| Liver metastasis               | 10 (6.1%)                             | 0 (0%)                | 10 (6.1%)                | 0                  | >0.9    | >0.9             |
| Unknown                        | 509                                   | 322                   | 0                        | 187                |         |                  |
| Bones metastasis               | 1 (0.6%)                              | 0 (0%)                | 1 (0.6%)                 | 0                  | >0.9    | >0.9             |
| Unknown                        | 509                                   | 322                   | 0                        | 187                |         |                  |
| Other metastasis               | 11 (6.7%)                             | 0 (0%)                | 11 (6.7%)                | 0                  | >0.9    | >0.9             |
| Unknown                        | 509                                   | 322                   | 0                        | 187                |         |                  |
| KRAS                           |                                       |                       |                          |                    |         |                  |
| Mutated                        | 50 (41%)                              | 0 (0%)                | 50 (41%)                 | 0                  |         |                  |
| Wild-Type                      | 72 (59%)                              | 0 (0%)                | 72 (59%)                 | 0                  |         |                  |
| Unknown                        | 550                                   | 322                   | 41                       | 187                |         |                  |
| BRAF                           |                                       |                       |                          |                    | >0.9    | >0.9             |
| Mutated                        | 10 (8.3%)                             | 0 (0%)                | 10 (8.3%)                | 0                  |         |                  |
| Wild-Type                      | 111 (92%)                             | 0 (0%)                | 111 (92%)                | 0                  |         |                  |
| Unknown                        | 551                                   | 322                   | 42                       | 187                |         |                  |

MSI: Microsatellite Instability; MMR: Mismatch Repair; MSS: Microsatellite Stable; dMMR: deficient Mismatch Repair; pMMR: proficient Mismatch repair

**Supplementary Table 3:** Pairwise comparisons of clinical variables between cohorts.

| Variables                      | Training cohort<br>N = 692 | Internal validation cohort<br>N = 297 | P-value | Adjusted p-value | Training cohort<br>N = 692 | External validation cohort<br>N = 672 | P-value | Adjusted p-value | Internal validation cohort<br>N = 297 | External validation cohort<br>N = 672 | P-value | Adjusted p-value |
|--------------------------------|----------------------------|---------------------------------------|---------|------------------|----------------------------|---------------------------------------|---------|------------------|---------------------------------------|---------------------------------------|---------|------------------|
| Sex                            |                            |                                       | 0.079   | 0.7              |                            |                                       | 0.4     | 0.6              |                                       |                                       | 0.3     | 0.6              |
| Male                           | 416 (60%)                  | 160 (54%)                             |         |                  | 416 (60%)                  | 389 (58%)                             |         |                  | 160 (54%)                             | 389 (58%)                             |         |                  |
| Female                         | 276 (40%)                  | 137 (46%)                             |         |                  | 276 (40%)                  | 283 (42%)                             |         |                  | 137 (46%)                             | 283 (42%)                             |         |                  |
| Age                            |                            |                                       | 0.3     | 0.8              |                            |                                       | <0.001  | <0.001           |                                       |                                       | <0.001  | <0.001           |
| ≤60                            | 61 (54, 67)                | 62 (54, 67)                           |         |                  | 61 (54, 67)                | 65 (57, 73)                           |         |                  | 62 (54, 67)                           | 65 (57, 73)                           |         |                  |
| >60                            | 341 (49%)                  | 135 (45%)                             | 0.3     | 0.8              | 341 (49%)                  | 223 (33%)                             | <0.001  | <0.001           | 135 (45%)                             | 223 (33%)                             | <0.001  | 0.002            |
| >60                            | 351 (51%)                  | 162 (55%)                             |         |                  | 351 (51%)                  | 449 (67%)                             |         |                  | 162 (55%)                             | 449 (67%)                             |         |                  |
| Histopathological grade        |                            |                                       | 0.6     | 0.8              |                            |                                       | 0.002   | 0.008            |                                       |                                       | 0.068   | 0.3              |
| Well/Moderately differentiated | 564 (82%)                  | 247 (83%)                             |         |                  | 564 (82%)                  | 589 (88%)                             |         |                  | 247 (83%)                             | 589 (88%)                             |         |                  |
| Poorly differentiated          | 128 (18%)                  | 50 (17%)                              |         |                  | 128 (18%)                  | 83 (12%)                              |         |                  | 50 (17%)                              | 83 (12%)                              |         |                  |
| T status                       |                            |                                       | 0.5     | 0.8              |                            |                                       | 0.7     | 0.8              |                                       |                                       | 0.8     | >0.9             |
| 1-3                            | 553 (80%)                  | 243 (82%)                             |         |                  | 553 (80%)                  | 543 (81%)                             |         |                  | 243 (82%)                             | 543 (81%)                             |         |                  |
| 4                              | 139 (20%)                  | 54 (18%)                              |         |                  | 139 (20%)                  | 129 (19%)                             |         |                  | 54 (18%)                              | 129 (19%)                             |         |                  |
| N status                       |                            |                                       | 0.2     | 0.8              |                            |                                       | 0.1     | 0.3              |                                       |                                       | >0.9    | >0.9             |
| 1                              | 441 (64%)                  | 201 (68%)                             |         |                  | 441 (64%)                  | 457 (68%)                             |         |                  | 201 (68%)                             | 457 (68%)                             |         |                  |
| 2                              | 251 (36%)                  | 96 (32%)                              |         |                  | 251 (36%)                  | 215 (32%)                             |         |                  | 96 (32%)                              | 215 (32%)                             |         |                  |
| Risk Stage                     |                            |                                       | 0.082   | 0.7              |                            |                                       | 0.2     | 0.4              |                                       |                                       | 0.5     | 0.8              |
| Low                            | 363 (52%)                  | 174 (59%)                             |         |                  | 363 (52%)                  | 378 (56%)                             |         |                  | 174 (59%)                             | 378 (56%)                             |         |                  |
| High                           | 329 (48%)                  | 123 (41%)                             |         |                  | 329 (48%)                  | 294 (44%)                             |         |                  | 123 (41%)                             | 294 (44%)                             |         |                  |
| M status                       |                            |                                       | 0.6     | 0.8              |                            |                                       | <0.001  | <0.001           |                                       |                                       | <0.001  | <0.001           |
| 0                              | 581 (84%)                  | 256 (86%)                             |         |                  | 581 (84%)                  | 132 (20%)                             |         |                  | 256 (86%)                             | 132 (20%)                             |         |                  |
| 1                              | 2 (0.3%)                   | 0 (0%)                                |         |                  | 2 (0.3%)                   | 0 (0%)                                |         |                  | 0 (0%)                                | 0 (0%)                                |         |                  |
| x                              | 109 (15.7%)                | 41 (14%)                              |         |                  | 109 (15.7%)                | 540 (80%)                             |         |                  | 41 (14%)                              | 540 (80%)                             |         |                  |
| MSI or MMR status              |                            |                                       | 0.8     | 0.8              |                            |                                       | >0.9    | >0.9             |                                       |                                       | 0.8     | >0.9             |
| MSS or pMMR                    | 620 (91%)                  | 259 (90%)                             |         |                  | 620 (91%)                  | 520 (91%)                             |         |                  | 259 (90%)                             | 520 (91%)                             |         |                  |
| MSI or dMMR                    | 63 (9%)                    | 28 (10%)                              |         |                  | 63 (9%)                    | 53 (9.2%)                             |         |                  | 28 (10%)                              | 53 (9.2%)                             |         |                  |
| Unknown                        | 9                          | 10                                    |         |                  | 9                          | 99                                    |         |                  | 10                                    | 99                                    |         |                  |
| Sidedness                      |                            |                                       | 0.2     | 0.8              |                            |                                       | 0.4     | 0.6              |                                       |                                       | 0.6     | 0.8              |
| Left                           | 410 (59%)                  | 163 (55%)                             |         |                  | 410 (59%)                  | 382 (57%)                             |         |                  | 163 (55%)                             | 382 (57%)                             |         |                  |
| Right                          | 282 (41%)                  | 134 (45%)                             |         |                  | 282 (41%)                  | 290 (43%)                             |         |                  | 134 (45%)                             | 290 (43%)                             |         |                  |
| Lung metastasis                |                            |                                       | 0.7     | 0.8              |                            |                                       | 0.6     | 0.8              |                                       |                                       | 0.8     | >0.9             |
| Unknown                        | 53 (7.7%)                  | 20 (6.7%)                             |         |                  | 53 (7.7%)                  | 10 (6.1%)                             |         |                  | 20 (6.7%)                             | 10 (6.1%)                             |         |                  |
| Unknown                        | 0                          | 0                                     |         |                  | 0                          | 509                                   |         |                  | 0                                     | 509                                   |         |                  |
| Liver metastasis               |                            |                                       | 0.7     | 0.8              |                            |                                       | 0.14    | 0.4              |                                       |                                       | 0.3     | 0.6              |
| Unknown                        | 71 (10%)                   | 28 (9.4%)                             |         |                  | 71 (10%)                   | 10 (6.1%)                             |         |                  | 28 (9.4%)                             | 10 (6.1%)                             |         |                  |
| Unknown                        | 0                          | 0                                     |         |                  | 0                          | 509                                   |         |                  | 0                                     | 509                                   |         |                  |
| Bone metastasis                |                            |                                       | 0.7     | 0.8              |                            |                                       | >0.9    | >0.9             |                                       |                                       | >0.9    | >0.9             |
| Unknown                        | 6 (0.9%)                   | 1 (0.3%)                              |         |                  | 6 (0.9%)                   | 1 (0.6%)                              |         |                  | 1 (0.3%)                              | 1 (0.6%)                              |         |                  |
| Unknown                        | 0                          | 0                                     |         |                  | 0                          | 509                                   |         |                  | 0                                     | 509                                   |         |                  |
| Other metastasis               |                            |                                       | 0.7     | 0.8              |                            |                                       | 0.4     | 0.6              |                                       |                                       | 0.3     | 0.6              |
| Unknown                        | 35 (5.1%)                  | 13 (4.4%)                             |         |                  | 35 (5.1%)                  | 11 (6.7%)                             |         |                  | 13 (4.4%)                             | 11 (6.7%)                             |         |                  |
| Unknown                        | 0                          | 0                                     |         |                  | 0                          | 509                                   |         |                  | 0                                     | 509                                   |         |                  |
| KRAS                           |                            |                                       | 0.7     | 0.8              |                            |                                       | 0.3     | 0.6              |                                       |                                       | 0.5     | 0.8              |
| Mutated                        | 321 (46%)                  | 134 (45%)                             |         |                  | 321 (46%)                  | 50 (41%)                              |         |                  | 134 (45%)                             | 50 (41%)                              |         |                  |
| Wild-Type                      | 371 (54%)                  | 163 (55%)                             |         |                  | 371 (54%)                  | 72 (59%)                              |         |                  | 163 (55%)                             | 72 (59%)                              |         |                  |
| Unknown                        | 0                          | 0                                     |         |                  | 0                          | 550                                   |         |                  | 0                                     | 550                                   |         |                  |
| BRAF                           |                            |                                       | 0.4     | 0.8              |                            |                                       | 0.4     | 0.6              |                                       |                                       | 0.2     | 0.6              |
| Mutated                        | 75 (11%)                   | 37 (13%)                              |         |                  | 75 (11%)                   | 10 (8.3%)                             |         |                  | 37 (13%)                              | 10 (8.3%)                             |         |                  |
| Wild-Type                      | 598 (89%)                  | 250 (87%)                             |         |                  | 598 (89%)                  | 111 (92%)                             |         |                  | 250 (87%)                             | 111 (92%)                             |         |                  |
| Unknown                        | 19                         | 10                                    |         |                  | 19                         | 551                                   |         |                  | 10                                    | 551                                   |         |                  |

MSI: Microsatellite Instability; MMR: Mismatch Repair; MSS: Microsatellite Stable; dMMR: deficient Mismatch Repair; pMMR: proficient Mismatch repair

**Supplementary Table 4:** Comparisons of clinical variables according to CD3 status (High vs Other) in each cohort.

| Variables                      | Training cohort |                |         |                     | Internal validation cohort |                |         |                     | External validation cohort |                |         |                     |
|--------------------------------|-----------------|----------------|---------|---------------------|----------------------------|----------------|---------|---------------------|----------------------------|----------------|---------|---------------------|
|                                | High<br>N=283   | Other<br>N=409 | P-value | Adjusted<br>p-value | High<br>N=118              | Other<br>N=179 | P-value | Adjusted<br>p-value | High<br>N=262              | Other<br>N=410 | P-value | Adjusted<br>p-value |
| Sex                            |                 |                | 0.4     | 0.4                 |                            |                | 0.2     | 0.6                 |                            |                | 0.8     | >0.9                |
| Male                           | 165 (58%)       | 251 (61%)      |         |                     | 58 (49%)                   | 102 (57%)      |         |                     | 153 (58%)                  | 236 (58%)      |         |                     |
| Female                         | 118 (42%)       | 158 (39%)      |         |                     | 60 (51%)                   | 77 (43%)       |         |                     | 109 (42%)                  | 174 (42%)      |         |                     |
| Age                            |                 |                | 0.2     | 0.3                 |                            |                | 0.5     | 0.7                 |                            |                | 0.3     | 0.6                 |
| ≤60                            | 60 (54, 67)     | 61 (54, 67)    |         |                     | 61 (54, 67)                | 62 (54, 68)    |         |                     | 64 (56, 73)                | 66 (58, 73)    |         |                     |
| >60                            | 150 (53%)       | 191 (47%)      | 0.10    | 0.2                 | 56 (47%)                   | 79 (44%)       | 0.6     | 0.7                 | 94 (36%)                   | 129 (31%)      | 0.2     | 0.6                 |
|                                | 133 (47%)       | 218 (53%)      |         |                     | 62 (53%)                   | 100 (56%)      |         |                     | 168 (64%)                  | 281 (69%)      |         |                     |
| Histopathological grade        |                 |                | 0.4     | 0.4                 |                            |                | 0.2     | 0.6                 |                            |                | 0.5     | 0.8                 |
| Well/Moderately differentiated | 235 (83%)       | 329 (80%)      |         |                     | 102 (86%)                  | 145 (81%)      |         |                     | 227 (87%)                  | 362 (88%)      |         |                     |
| Poorly differentiated          | 48 (17%)        | 80 (20%)       |         |                     | 16 (14%)                   | 34 (19%)       |         |                     | 35 (13%)                   | 48 (12%)       |         |                     |
| T status                       |                 |                | 0.022   | 0.12                |                            |                | 0.3     | 0.6                 |                            |                | 0.3     | 0.6                 |
| 1-3                            | 238 (84%)       | 315 (77%)      |         |                     | 100 (85%)                  | 143 (80%)      |         |                     | 206 (79%)                  | 337 (82%)      |         |                     |
| 4                              | 45 (16%)        | 94 (23%)       |         |                     | 18 (15%)                   | 36 (20%)       |         |                     | 56 (21%)                   | 73 (18%)       |         |                     |
| N status                       |                 |                | 0.2     | 0.3                 |                            |                | 0.3     | 0.6                 |                            |                | 0.030   | 0.5                 |
| 1                              | 188 (66%)       | 253 (62%)      |         |                     | 84 (71%)                   | 117 (65%)      |         |                     | 191 (73%)                  | 266 (65%)      |         |                     |
| 2                              | 95 (34%)        | 156 (38%)      |         |                     | 34 (29%)                   | 62 (35%)       |         |                     | 71 (27%)                   | 144 (35%)      |         |                     |
| Risk Stage                     |                 |                | 0.052   | 0.2                 |                            |                | 0.10    | 0.5                 |                            |                | 0.8     | >0.9                |
| Low                            | 161 (57%)       | 202 (49%)      |         |                     | 76 (64%)                   | 98 (55%)       |         |                     | 149 (57%)                  | 229 (56%)      |         |                     |
| High                           | 122 (43%)       | 207 (51%)      |         |                     | 42 (36%)                   | 81 (45%)       |         |                     | 113 (43%)                  | 181 (44%)      |         |                     |
| M status                       |                 |                | 0.092   | 0.2                 |                            |                | 0.3     | 0.6                 |                            |                | 0.6     | 0.9                 |
| 0                              | 230 (81%)       | 351 (86%)      |         |                     | 105 (89%)                  | 151 (84%)      |         |                     | 54 (21%)                   | 78 (19%)       |         |                     |
| 1                              | 0 (0%)          | 2 (0.5%)       |         |                     | 0                          | 0              |         |                     | 0                          | 0              |         |                     |
| x                              | 53 (19%)        | 56 (14%)       |         |                     | 13 (11%)                   | 28 (16%)       |         |                     | 208 (79%)                  | 332 (81%)      |         |                     |
| MSI or MMR status              |                 |                | 0.002   | 0.016               |                            |                | 0.4     | 0.6                 |                            |                | 0.14    | 0.6                 |
| MSS or pMMR                    | 240 (87%)       | 380 (94%)      |         |                     | 99 (88%)                   | 160 (91%)      |         |                     | 192 (88%)                  | 328 (92%)      |         |                     |
| MSI or dMMR                    | 37 (13%)        | 26 (6.4%)      |         |                     | 13 (12%)                   | 15 (9%)        |         |                     | 25 (12%)                   | 28 (7.9%)      |         |                     |
| Unknown                        | 6               | 3              |         |                     | 6                          | 4              |         |                     | 45                         | 54             |         |                     |
| Sidedness                      |                 |                | <0.001  | 0.010               |                            |                | 0.020   | 0.3                 |                            |                | 0.3     | 0.7                 |
| Left                           | 146 (52%)       | 264 (65%)      |         |                     | 55 (47%)                   | 108 (60%)      |         |                     | 143 (55%)                  | 239 (58%)      |         |                     |
| Right                          | 137 (48%)       | 145 (35%)      |         |                     | 63 (53%)                   | 71 (40%)       |         |                     | 119 (45%)                  | 171 (42%)      |         |                     |
| Lung metastasis                |                 |                | 0.4     | 0.4                 |                            |                | 0.7     | 0.7                 |                            |                | 0.093   | 0.5                 |
| Unknown                        | 19 (6.7%)       | 34 (8.3%)      |         |                     | 7 (5.9%)                   | 13 (7.3%)      |         |                     | 7 (10%)                    | 3 (3.1%)       |         |                     |
|                                | 0               | 0              |         |                     | 0                          | 0              |         |                     | 195                        | 314            |         |                     |
| Liver metastasis               |                 |                | 0.041   | 0.2                 |                            |                | 0.094   | 0.5                 |                            |                | 0.5     | 0.8                 |
| Unknown                        | 21 (7.4%)       | 50 (12%)       |         |                     | 7 (5.9%)                   | 21 (12%)       |         |                     | 3 (4.5%)                   | 7 (7.3%)       |         |                     |
|                                | 0               | 0              |         |                     | 0                          | 0              |         |                     | 195                        | 314            |         |                     |
| Bone metastasis                |                 |                | 0.4     | 0.4                 |                            |                | >0.9    | >0.9                |                            |                | >0.9    | >0.9                |
| Unknown                        | 1 (0.4%)        | 5 (1.2%)       |         |                     | 0 (0%)                     | 1 (0.6%)       |         |                     | 0 (0%)                     | 1 (1.0%)       |         |                     |
|                                | 0               | 0              |         |                     | 0                          | 0              |         |                     | 195                        | 314            |         |                     |
| Other metastasis               |                 |                | 0.13    | 0.2                 |                            |                | 0.5     | 0.7                 |                            |                | >0.9    | >0.9                |
| Unknown                        | 10 (3.5%)       | 25 (6.1%)      |         |                     | 4 (3.4%)                   | 9 (5.0%)       |         |                     | 4 (6.0%)                   | 7 (7.3%)       |         |                     |
|                                | 0               | 0              |         |                     | 0                          | 0              |         |                     | 195                        | 314            |         |                     |
| KRAS                           |                 |                | 0.2     | 0.2                 |                            |                | >0.9    | >0.9                |                            |                | 0.067   | 0.5                 |
| Mutated                        | 122 (43%)       | 199 (49%)      |         |                     | 53 (45%)                   | 81 (45%)       |         |                     | 16 (31%)                   | 34 (48%)       |         |                     |
| Wild-Type                      | 161 (57%)       | 210 (51%)      |         |                     | 65 (55%)                   | 98 (55%)       |         |                     | 35 (69%)                   | 37 (52%)       |         |                     |
| Unknown                        | 0               | 0              |         |                     | 0                          | 0              |         |                     | 211                        | 339            |         |                     |
| BRAF                           |                 |                | 0.10    | 0.2                 |                            |                | 0.3     | 0.6                 |                            |                | 0.7     | >0.9                |
| Mutated                        | 37 (14%)        | 38 (10%)       |         |                     | 12 (11%)                   | 25 (14%)       |         |                     | 5 (10%)                    | 5 (7.0%)       |         |                     |
| Wild-Type                      | 236 (86%)       | 362 (90%)      |         |                     | 102 (89%)                  | 148 (86%)      |         |                     | 45 (90%)                   | 66 (93%)       |         |                     |
| Unknown                        | 10              | 9              |         |                     | 4                          | 6              |         |                     | 212                        | 339            |         |                     |

MSI: Microsatellite Instability; MMR: Mismatch Repair; MSS: Microsatellite Stable; dMMR: deficient Mismatch Repair; pMMR: proficient Mismatch Repair

**Supplementary Table 5:** Comparisons of clinical variables according to CD3ML status in each cohort.

| Variables                      | Training cohort |               |         |                     | Internal validation cohort |               |         |                     | External validation cohort |               |              |                     |
|--------------------------------|-----------------|---------------|---------|---------------------|----------------------------|---------------|---------|---------------------|----------------------------|---------------|--------------|---------------------|
|                                | Low<br>N=478    | High<br>N=214 | P-value | Adjusted<br>p-value | Low<br>N=157               | High<br>N=140 | P-value | Adjusted<br>p-value | Low<br>N=373               | High<br>N=299 | P-value      | Adjusted<br>p-value |
| Sex                            |                 |               | 0.2     | 0.3                 |                            |               | 0.9     | >0.9                |                            |               | 0.4          | 0.5                 |
| Male                           | 279 (58%)       | 137 (64%)     |         |                     | 84 (54%)                   | 76 (54%)      |         |                     | 210 (56%)                  | 179 (60%)     |              |                     |
| Female                         | 199 (42%)       | 77 (36%)      |         |                     | 73 (46%)                   | 64 (46%)      |         |                     | 163 (44%)                  | 120 (40%)     |              |                     |
| Age                            | 60 (53, 67)     | 62 (55, 67)   | 0.11    | 0.3                 | 62 (53, 68)                | 61 (55, 67)   | >0.9    | >0.9                | 64 (57, 72)                | 67 (58, 75)   | <b>0.004</b> | <b>0.036</b>        |
| ≤60                            | 241 (50%)       | 100 (47%)     | 0.4     | 0.5                 | 69 (44%)                   | 66 (47%)      | 0.6     | >0.9                | 136 (36%)                  | 87 (29%)      | 0.044        | 0.2                 |
| >60                            | 237 (50%)       | 114 (53%)     |         |                     | 88 (56%)                   | 74 (53%)      |         |                     | 237 (64%)                  | 212 (71%)     |              |                     |
| Histopathological grade        |                 |               | 0.3     | 0.4                 |                            |               | 0.046   | 0.11                |                            |               | 0.8          | >0.9                |
| Well/Moderately differentiated | 395 (83%)       | 169 (79%)     |         |                     | 137 (87%)                  | 110 (79%)     |         |                     | 326 (87%)                  | 263 (88%)     |              |                     |
| Poorly differentiated          | 83 (17%)        | 45 (21%)      |         |                     | 20 (13%)                   | 30 (21%)      |         |                     | 47 (13%)                   | 36 (12%)      |              |                     |
| T status                       |                 |               | 0.014   | 0.055               |                            |               | 0.049   | 0.11                |                            |               | 0.13         | 0.3                 |
| 1-3                            | 394 (82%)       | 159 (74%)     |         |                     | 135 (86%)                  | 108 (77%)     |         |                     | 309 (83%)                  | 234 (78%)     |              |                     |
| 4                              | 84 (18%)        | 55 (26%)      |         |                     | 22 (14%)                   | 32 (23%)      |         |                     | 64 (17%)                   | 65 (22%)      |              |                     |
| N status                       |                 |               | <0.001  | 0.002               |                            |               | <0.001  | <0.001              |                            |               | 0.2          | 0.4                 |
| 1                              | 326 (68%)       | 115 (54%)     |         |                     | 122 (78%)                  | 79 (56%)      |         |                     | 261 (70%)                  | 196 (66%)     |              |                     |
| 2                              | 152 (32%)       | 99 (46%)      |         |                     | 35 (22%)                   | 61 (44%)      |         |                     | 112 (30%)                  | 103 (34%)     |              |                     |
| Risk Stage                     |                 |               | <0.001  | 0.001               |                            |               | <0.001  | <0.001              |                            |               | 0.080        | 0.2                 |
| Low                            | 275 (58%)       | 88 (41%)      |         |                     | 109 (69%)                  | 65 (46%)      |         |                     | 221 (59%)                  | 157 (53%)     |              |                     |
| High                           | 203 (42%)       | 126 (59%)     |         |                     | 48 (31%)                   | 75 (54%)      |         |                     | 152 (41%)                  | 142 (47%)     |              |                     |
| M status                       |                 |               | 0.5     | 0.5                 |                            |               | 0.8     | >0.9                |                            |               | 0.004        | 0.036               |
| 0                              | 398 (83%)       | 183 (86%)     |         |                     | 136 (87%)                  | 120 (86%)     |         |                     | 88 (24%)                   | 44 (15%)      |              |                     |
| 1                              | 1 (0.2%)        | 1 (0.5%)      |         |                     | 0                          | 0             |         |                     | 0                          | 0             |              |                     |
| x                              | 79 (17%)        | 30 (14%)      |         |                     | 21 (13%)                   | 20 (14%)      |         |                     | 285 (76%)                  | 255 (85%)     |              |                     |
| MSI or MMR status              |                 |               | 0.029   | 0.093               |                            |               | 0.10    | 0.2                 |                            |               | 0.9          | >0.9                |
| MSS or pMMR                    | 419 (89%)       | 201 (94%)     |         |                     | 133 (88%)                  | 126 (93%)     |         |                     | 298 (91%)                  | 222 (91%)     |              |                     |
| MSI or dMMR                    | 51 (11%)        | 12 (5.6%)     |         |                     | 19 (12%)                   | 9 (6.7%)      |         |                     | 31 (9.4%)                  | 22 (9.0%)     |              |                     |
| Unknown                        | 8               | 1             |         |                     | 5                          | 5             |         |                     | 44                         | 55            |              |                     |
| Sidedness                      |                 |               | 0.4     | 0.5                 |                            |               | 0.6     | >0.9                |                            |               | 0.086        | 0.2                 |
| Left                           | 278 (58%)       | 132 (62%)     |         |                     | 84 (54%)                   | 79 (56%)      |         |                     | 223 (60%)                  | 159 (53%)     |              |                     |
| Right                          | 200 (42%)       | 82 (38%)      |         |                     | 73 (46%)                   | 61 (44%)      |         |                     | 150 (40%)                  | 140 (47%)     |              |                     |
| Lung metastasis                | 34 (7.1%)       | 19 (8.9%)     | 0.4     | 0.5                 | 6 (3.8%)                   | 14 (10%)      | 0.034   | 0.11                | 7 (6.6%)                   | 3 (5.3%)      | >0.9         | >0.9                |
| Unknown                        | 0               | 0             |         |                     | 0                          | 0             |         |                     | 267                        | 242           |              |                     |
| Liver metastasis               | 44 (9.2%)       | 27 (13%)      | 0.2     | 0.3                 | 9 (5.7%)                   | 19 (14%)      | 0.021   | 0.11                | 6 (5.7%)                   | 4 (7.0%)      | 0.7          | >0.9                |
| Unknown                        | 0               | 0             |         |                     | 0                          | 0             |         |                     | 267                        | 242           |              |                     |
| Bone metastasis                | 4 (0.8%)        | 2 (0.9%)      | >0.9    | >0.9                | 1 (0.6%)                   | 0 (0%)        | >0.9    | >0.9                | 0 (0%)                     | 1 (1.8%)      | 0.3          | 0.5                 |
| Unknown                        | 0               | 0             |         |                     | 0                          | 0             |         |                     | 267                        | 242           |              |                     |
| Other metastasis               | 16 (3.3%)       | 19 (8.9%)     | 0.002   | 0.011               | 3 (1.9%)                   | 10 (7.1%)     | 0.028   | 0.11                | 3 (2.8%)                   | 8 (14%)       | 0.017        | 0.091               |
| Unknown                        | 0               | 0             |         |                     | 0                          | 0             |         |                     | 267                        | 242           |              |                     |
| KRAS                           |                 |               | >0.9    | >0.9                |                            |               | 0.7     | >0.9                |                            |               | 0.087        | 0.2                 |
| Mutated                        | 222 (46%)       | 99 (46%)      |         |                     | 69 (44%)                   | 65 (46%)      |         |                     | 31 (36%)                   | 19 (53%)      |              |                     |
| Wild-Type                      | 256 (54%)       | 115 (54%)     |         |                     | 88 (56%)                   | 75 (54%)      |         |                     | 55 (64%)                   | 17 (47%)      |              |                     |
| Unknown                        | 0               | 0             |         |                     | 0                          | 0             |         |                     | 287                        | 263           |              |                     |
| BRAF                           |                 |               | 0.3     | 0.5                 |                            |               | 0.9     | >0.9                |                            |               | 0.2          | 0.3                 |
| Mutated                        | 48 (10%)        | 27 (13%)      |         |                     | 20 (13%)                   | 17 (12%)      |         |                     | 5 (5.9%)                   | 5 (14%)       |              |                     |
| Wild-Type                      | 415 (90%)       | 183 (87%)     |         |                     | 131 (87%)                  | 119 (88%)     |         |                     | 80 (94%)                   | 31 (86%)      |              |                     |
| Unknown                        | 15              | 4             |         |                     | 6                          | 4             |         |                     | 288                        | 263           |              |                     |

MSI: Microsatellite Instability; MMR: Mismatch Repair; MSS: Microsatellite Stable; dMMR: deficient Mismatch Repair; pMMR: proficient Mismatch repair

# Supplementary Figure 1: Flowcharts of study

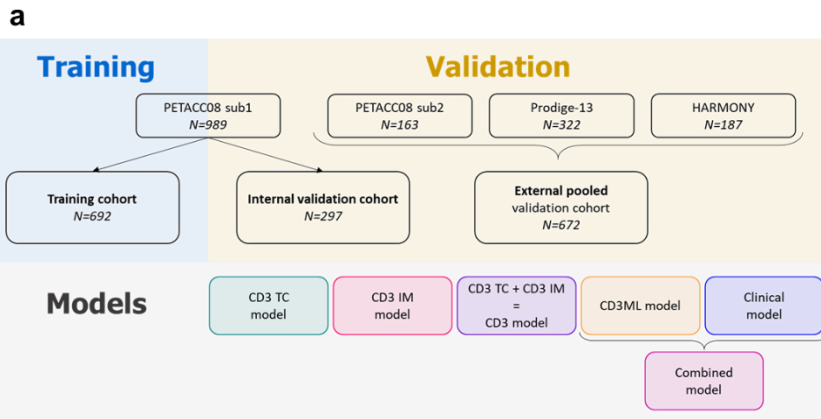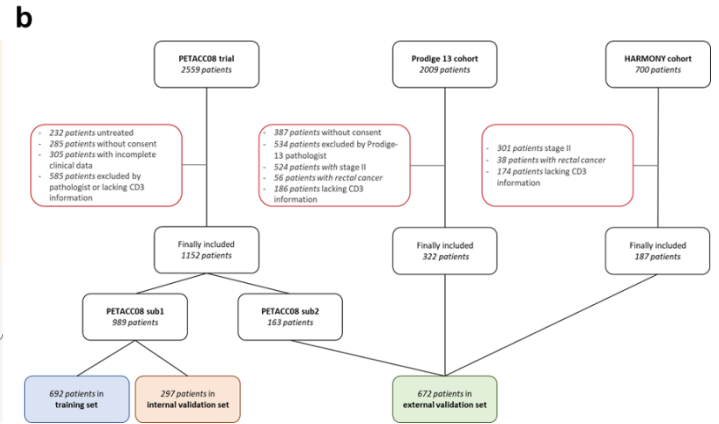

a) Flowchart of study cohorts and models. b) Consort diagram of patients included or excluded for study.

## Supplementary Figure 2: Clinical variables and digital scores

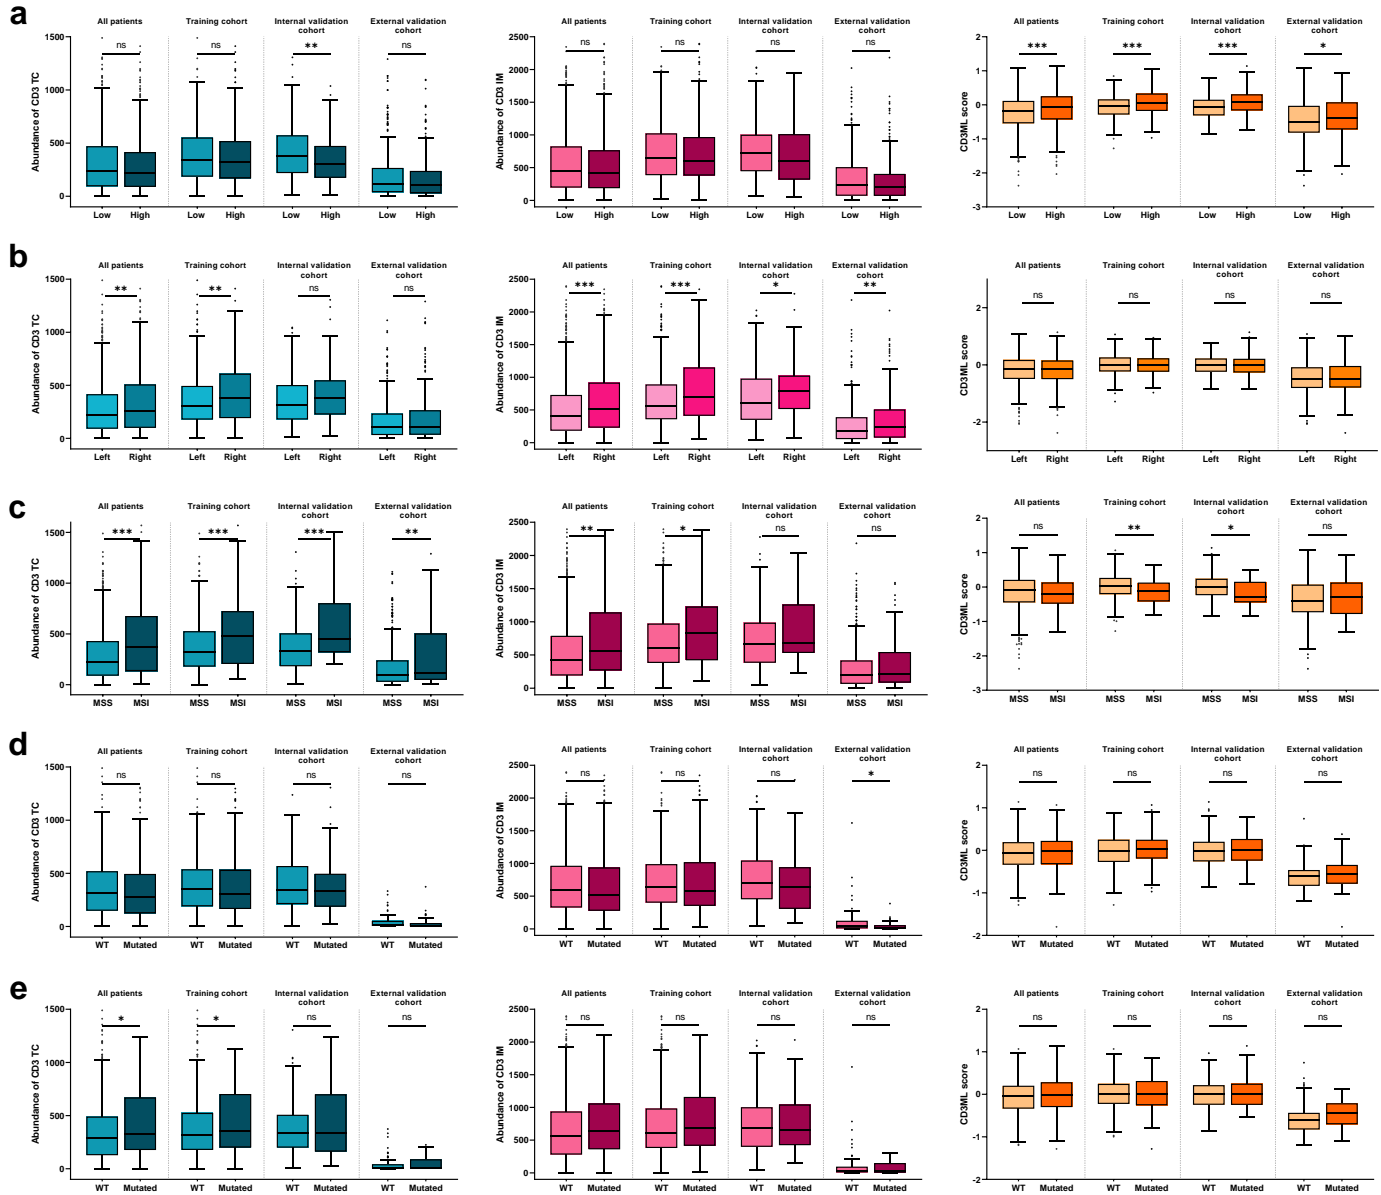

Boxplots showing CD3 TC (blue), CD3 IM (pink) and CD3ML (orange) score expression for the whole cohort and for the training, internal validation and external validation cohorts according to a) risk stage, b) sidedness, c) MSI/MMR status, d) KRAS mutated status and e) BRAF mutated status.

Wilcoxon tests: \* $p < 0.05$ , \*\* $p < 0.01$  and \*\*\* $p < 0.001$

TC: Tumour Core; IM: Invasive Margin; MSI: Microsatellite Instability; MMR: Mismatch repair



**Supplementary Figure 3: Association between CD3 and CD3ML scores**

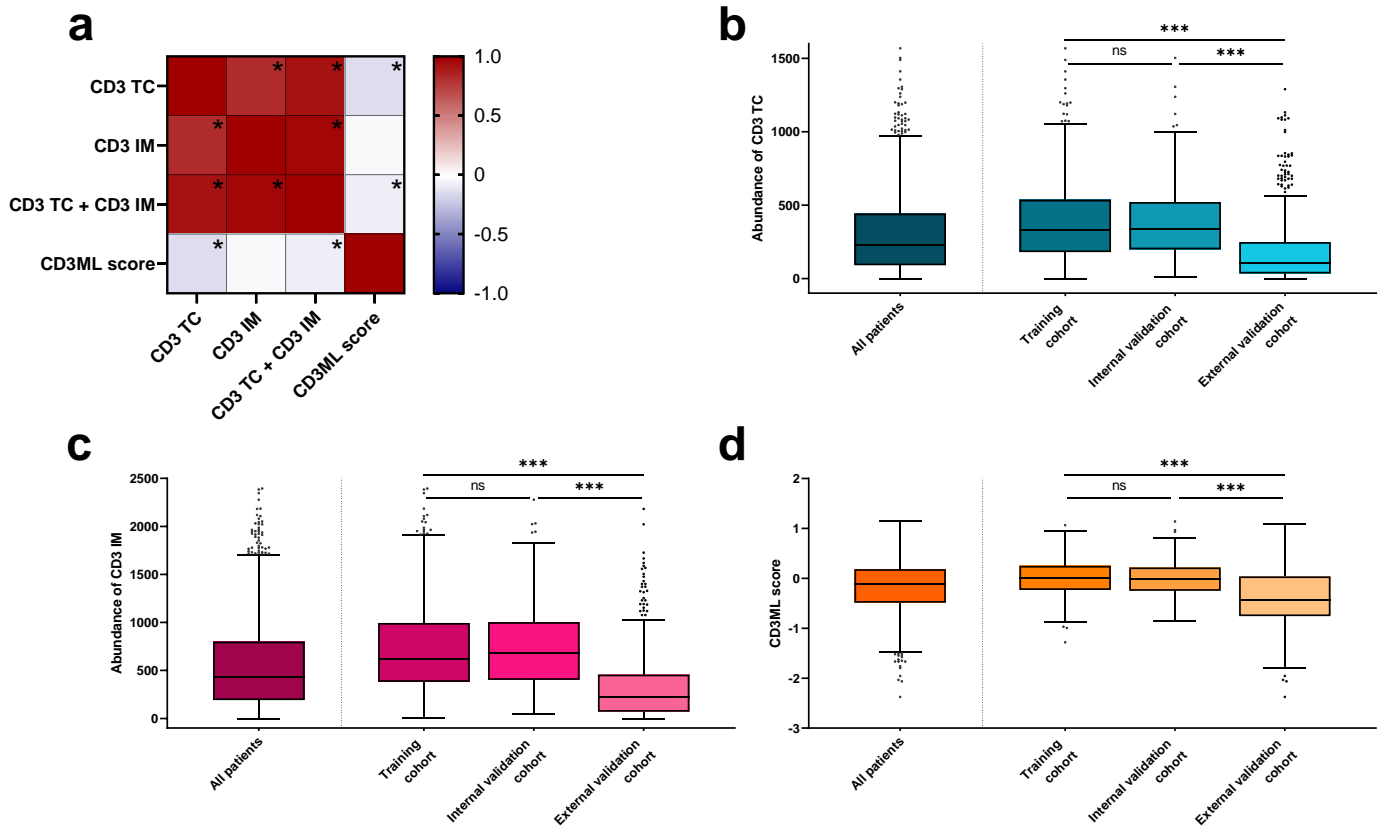

a) Heatmap showing the correlation matrix between CD3 TC, IM, CD3TC+CD3IM and CD3ML scores; correlations were calculated with Pearson's correlation coefficient and  $p$ -value  $< 0.05$  are represented by a star.

Boxplots showing b) CD3 TC score, c) CD3 IM score and d) CD3ML score in all patients according to training, internal validation and external validation cohorts.

Wilcoxon tests: \* $p < 0.05$ , \*\* $p < 0.01$  and \*\*\* $p < 0.001$

TC: Tumour Core; IM: Invasive Margin

Supplementary Figure 4: Association between CD3ML score and N status in all cohort.

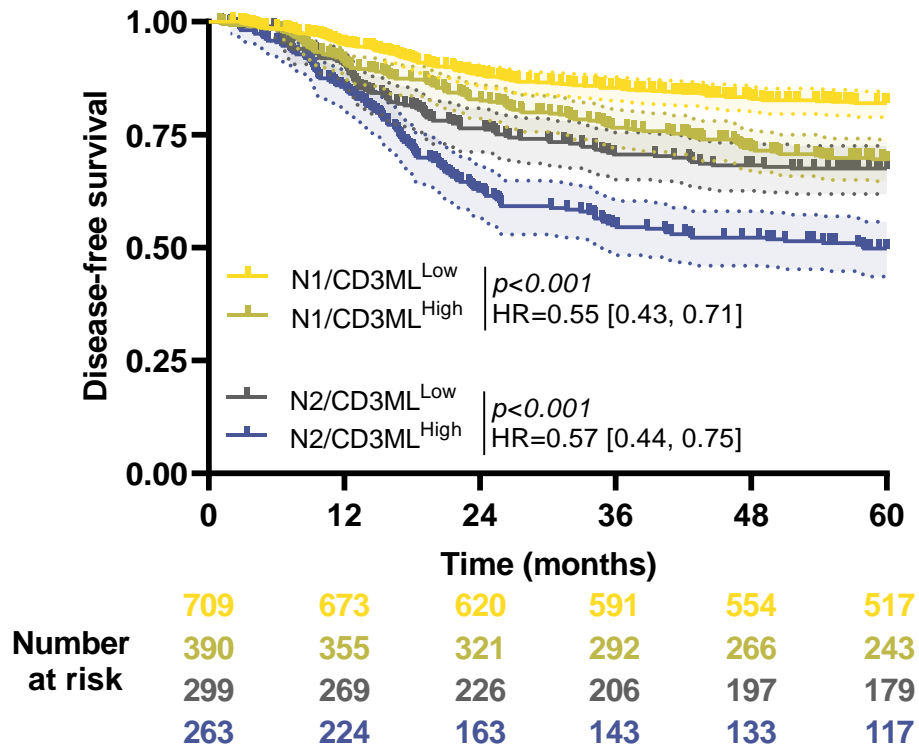

Kaplan-Meier curves with patients stratified according to CD3ML and N status for disease-free survival in all patients. Hazard ratio and log-rank test p-value were shown when proportional hazards assumption was verified, otherwise the RMST measure and p-value were shown.

**Supplementary Figure 5: Association between risk stage and CD3ML score in each cohort**

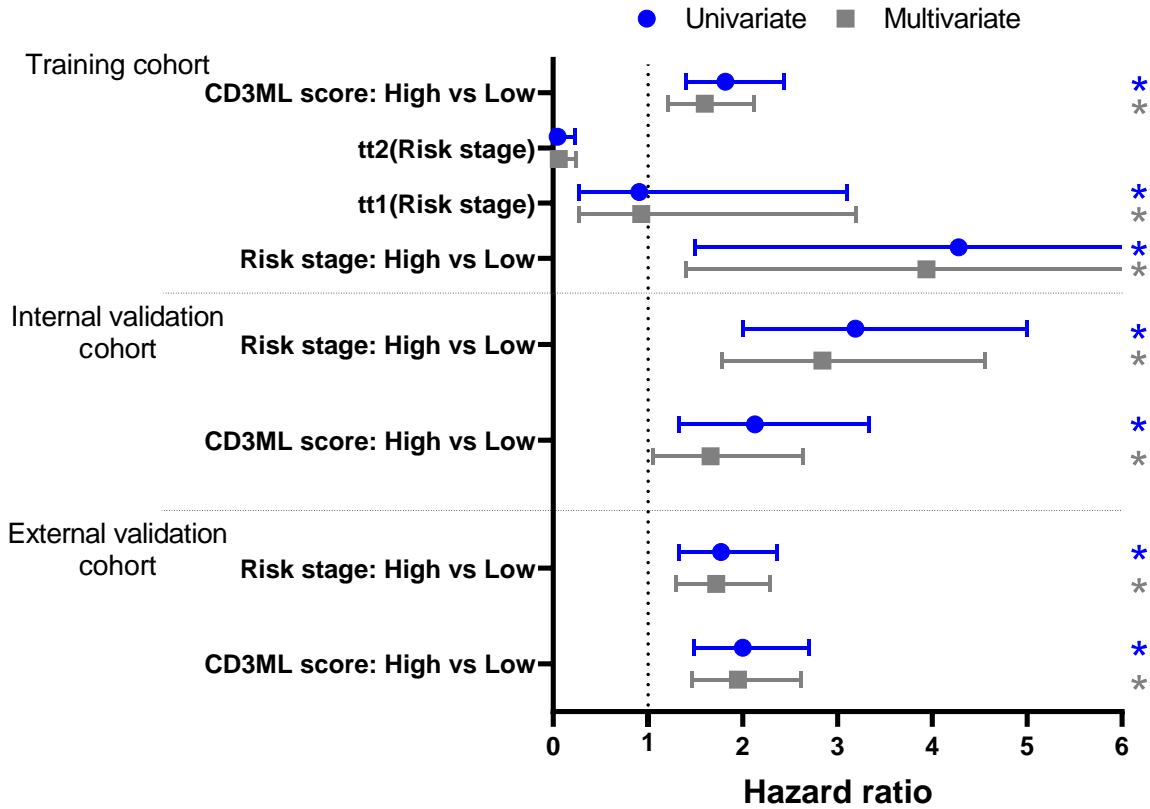

Forest plots representing hazard ratios and confidence intervals for univariate (blue) and multivariate (grey). Cox models for disease-free survival estimated using risk stage and CD3ML score in each cohort. \*: Log-rank test p-value  $\leq 0.05$ . Risk stage variable was estimated using time-dependent coefficient. Coefficients for tt1(Risk stage) and tt2(Risk stage) describe time varying effect of risk stage evaluated between 0 and 22 months, and 22 and 60 months, respectively.

Supplementary Figure 6: Predictive power of clinical and digital variables

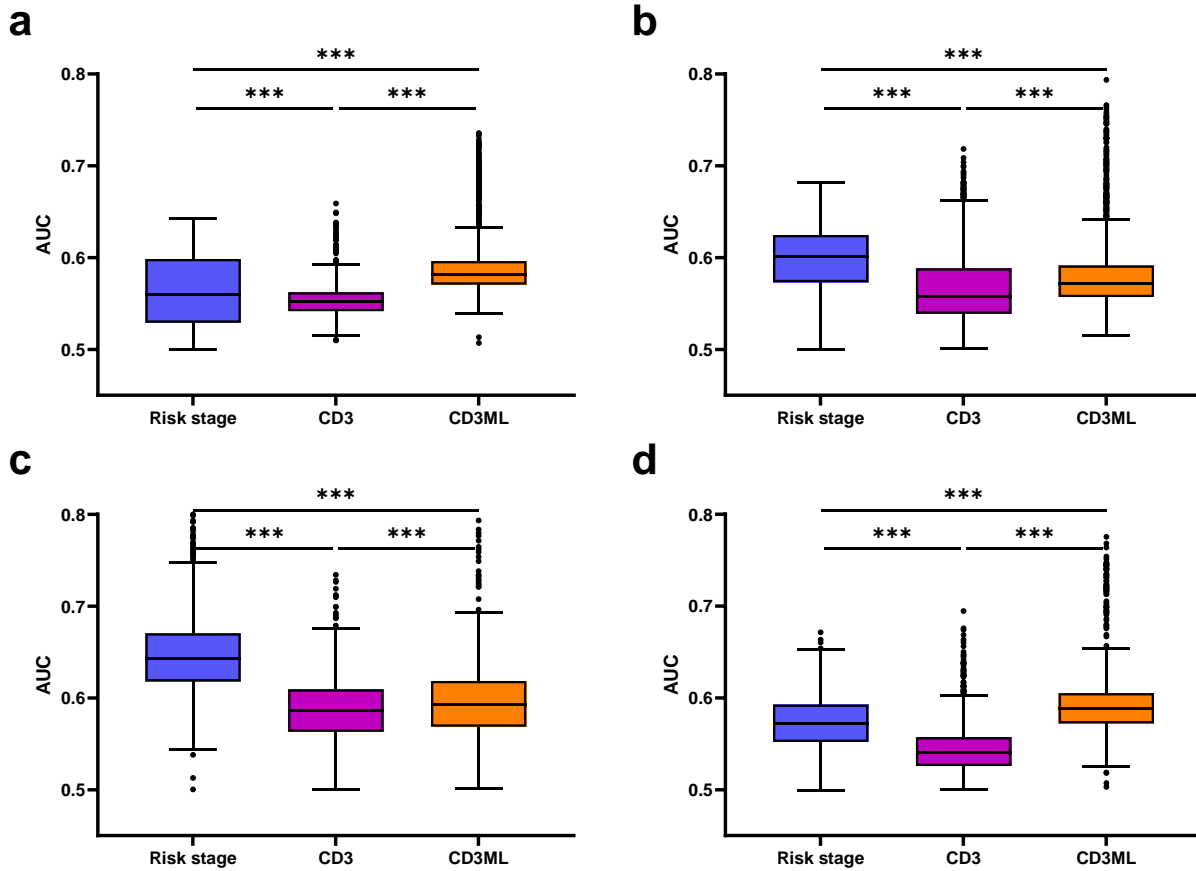

Boxplots showing the area under the curve (AUC) of different variables of interest using a 1000x bootstrap strategy in a) the whole cohort, b) the training cohort, c) the internal validation cohort and d) the external validation cohort. Wilcoxon tests: \*\*\* $p < 0.001$
